# Supplementary material for: Long noncoding RNA ARHGAP27P1 inhibits gastric cancer cell proliferation and cell cycle progression through epigenetically regulating p15 and p16
Source: publisher site journal article supplement (doi:10.18632/aging.102377), 2019-10-30
Supplement: Supplementary file [file aging-v11i20-102377-supplementary-material-SD1.pdf]

SUPPLEMENTARY FIGURES

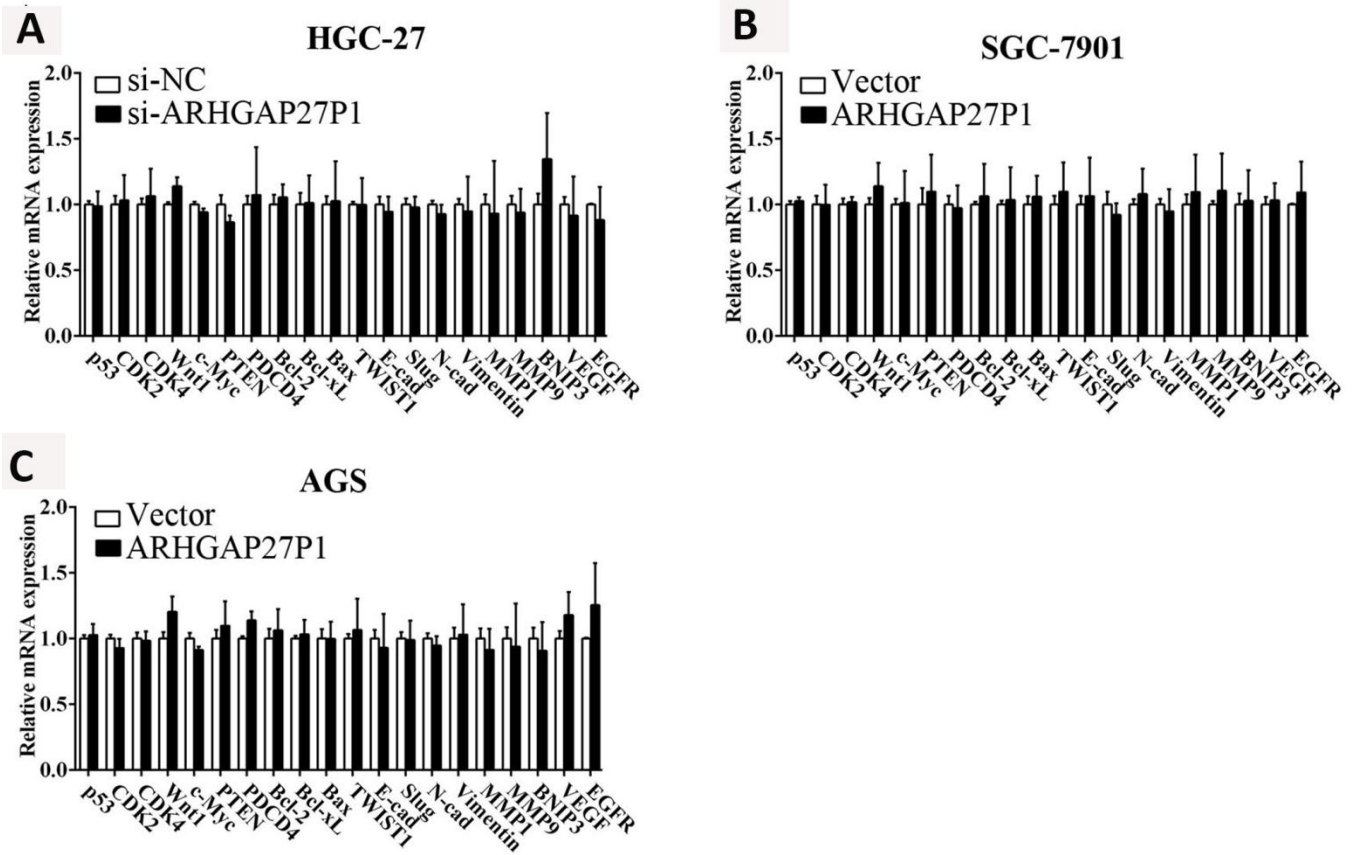

**Supplementary Figure 1. ARHGAP27P1 showed minimal effects on the expression of diverse potential genes involved in GC progression.** (A) RT-qPCR analysis of p53, CDK2, CDK4, Wnt1, c-Myc, PTEN, PDCD4, Bcl-2, Bcl-xL, Bax, TWIST1, E-cad, Slug, N-cad, Vimentin, MMP1, MMP9, BNIP3, VEGF and EGFR in HGC-27 cells transfected with si-ARHGAP27P1 or si-NC. (B and C) RT-qPCR analysis of the above genes in SGC-7901 or AGS transfected with pcDNA-ARHGAP27P1 or pcDNA.

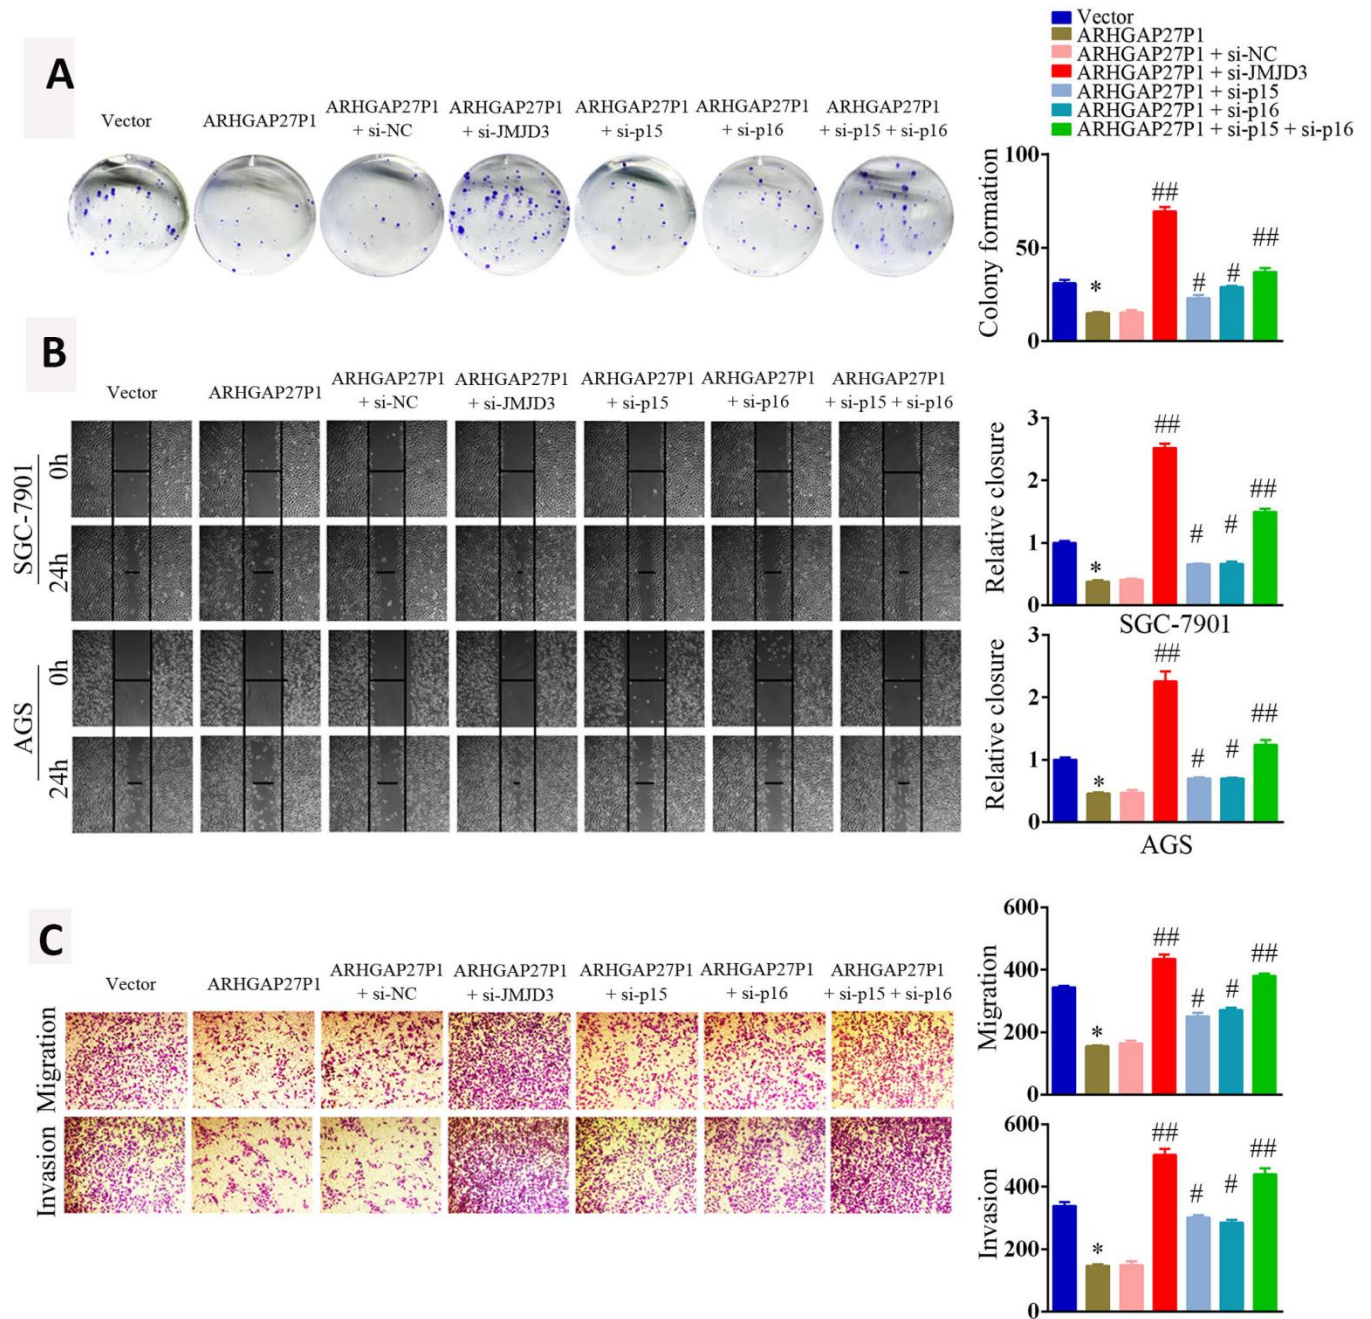

**Supplementary Figure 2. Silencing of JMJD3, p15 or p16 counteracted the tumor suppressive effect of ARHGAP27P.** (A) ARHGAP27P1-overexpressing AGS cells were cotransfected with si-JMJD3, si-p15 or si-p16. Cell proliferation was determined by colony formation assays. (B) Wound-healing assays for ARHGAP27P1-overexpressing SGC-7901 or AGS cells cotransfected with si-JMJD3, si-p15 or si-p16. (C) Migration and invasion assays for ARHGAP27P1-overexpressing AGS cells cotransfected with si-JMJD3, si-p15 or si-p16. \* $P < 0.05$  versus vector. ## $P < 0.05$ , ### $P < 0.01$  versus ARHGAP27P1.
